# Supplementary material for: Symptoms of depression, perceived social support, and medical coping modes among middle-aged and elderly patients with type 2 diabetes
Source: Front Mol Biosci. 2023 Mar 20;10:1167721. doi: 10.3389/fmolb.2023.1167721 (PMC10108626; doi:10.3389/fmolb.2023.1167721)
Supplement: Supplementary file 1 [file Table1.XLSX]

## Sheet: list-A
Respondents							degree of depression			glucose
diabetics	Age	Sex	BMI	Education	complictions	medical history(years)	Mild	moderate	severe	FBG	2hBG
No01	55	1	23.82	0	3	10	1	0	0	8.84	11.21
No02	68	1	24.5859	0	1	6	1	0	0	8.63	10.55
No03	76	1	25.3734	0	2	10	1	0	0	8.89	11.29
No04	58	2	25.2871	0	1	6	1	0	0	8.95	10.85
No05	75	1	24.1529	0	2	8	1	0	0	8.86	11.83
No06	62	2	23.5716	0	2	2	1	0	0	8.78	12.13
No07	61	1	27.2604	0	3	5	1	0	0	9.31	12.56
No08	72	2	24.613	0	4	7	0	1	0	10.82	13.12
No09	60	1	27.112	0	3	10	0	0	1	11.03	13.13
No10	52	2	28.7487	2	1	3	1	0	0	8.94	10.13
No11	57	2	28.8164	0	3	5	1	0	0	9.69	12.69
No12	62	2	29.1468	2	2	11	1	0	0	9.98	12.29
No13	69	2	27.5364	0	1	4	1	0	0	9.09	11.3
No14	57	2	25.7881	0	3	7	1	0	0	9.28	12.61
No15	67	2	28.5634	0	3	8	1	0	0	9.18	12.46
No16	54	2	23.8496	0	2	9	1	0	0	8.53	13.4
No17	65	2	25.3322	0	3	11	1	0	0	9.97	13.99
No18	60	2	26.5495	0	2	2	1	0	0	8.98	13.59
No19	58	2	24.2969	0	4	7	0	1	0	9.98	13.75
No20	35	2	28.2793	2	4	6	0	0	1	10.83	14.54
No21	44	2	27.1462	2	2	4	0	0	1	10.84	14.16
No22	61	1	23.5108	0	3	6	1	0	0	9.56	11.41
No23	59	1	25.2132	0	2	5	1	0	0	8.89	11.6
No24	72	2	28.5154	0	3	6	1	0	0	9.62	11.16
No25	57	1	24.2988	0	4	8	1	0	0	9.29	12.22
No26	74	2	27.8954	0	1	6	1	0	0	9.62	11.46
No27	48	1	23.3045	2	3	4	1	0	0	9.17	12.52
No28	58	1	29.7879	0	3	7	0	1	0	10.48	13.32
No29	60	2	24.8637	0	4	9	0	1	0	11.85	13.26
No30	45	2	25.7349	0	1	5	1	0	0	8.98	11.97
No31	68	2	26.9818	0	4	9	1	0	0	9.69	13.09
No32	56	2	27.6805	0	2	4	1	0	0	8.74	12.12
No33	69	2	28.8436	0	4	11	1	0	0	9.91	13.45
No34	53	2	28.869	2	1	5	0	1	0	9.25	11.5
No35	52	2	26.6348	0	4	7	0	1	0	10.82	13.62
No36	66	2	25.1583	0	3	9	0	1	0	9.22	12.84
No37	62	2	25.9308	0	0	8	0	1	0	9.23	11.78
No38	62	2	24.3815	0	5	12	0	0	1	10.97	13.89
No39	75	2	23.8496	0	2	9	0	1	0	11.54	12.38
No40	75	2	29.1468	0	2	7	0	0	1	12.45	14.53
No41	81	1	25.3734	0	2	11	0	0	1	12.24	14.76
No42	58	2	26.6777	0	1	2	1	0	0	8.69	10.99
No43	61	1	24.6653	2	1	2	0	0	0	8.41	11.76
No44	43	1	19.9693	0	2	3	0	0	0	7.99	12.24
No45	53	1	26.49	0	2	2	0	0	0	8.34	12.89
No46	71	1	27.532	0	3	4	0	0	0	8.63	12.42
No47	52	1	24.9044	0	1	2	0	0	0	8.31	10.76
No48	64	1	25.3841	0	2	4	0	0	0	8.82	10.95
No49	59	2	24.3526	0	2	5	0	0	0	8.57	12.25
No50	62	1	26.402	0	2	5	0	0	0	8.37	11.74
No51	72	1	24.266	0	1	2	0	0	0	8.98	10.36
No52	63	2	28.5738	0	3	4	0	0	0	9.54	11.31
No53	56	1	23.7677	2	2	2	0	0	0	8.87	11.82
No54	69	2	23.2249	0	1	5	0	0	0	8.72	10.08
No55	56	1	23.4147	0	2	8	0	0	0	8.63	10.76
No56	54	1	27.6519	2	2	2	0	0	0	8.59	11.12
No57	61	1	28.7888	0	2	4	0	0	0	8.65	11.38
No58	56	1	22.0695	0	2	5	0	0	0	8.56	12.17
No59	46	1	25.9328	0	1	2	0	0	0	8.76	11.05
No60	57	1	25.9626	0	2	3	0	0	0	9.1	11.1
No61	57	1	23.373	0	1	5	0	0	0	8.54	10.7
No62	53	2	25.0581	0	1	4	0	0	0	8.74	10.42
No63	52	1	25.1551	2	1	2	0	0	0	8.68	10.39
No64	41	2	24.2185	0	1	2	0	0	0	8.36	10.38
No65	79	1	23.6339	0	0	6	0	0	0	8.54	10.8
No66	75	2	28.1198	0	3	7	0	0	0	8.95	12.03
No67	82	1	24.5236	0	1	5	0	0	0	8.64	11.45
No68	51	2	27.311	0	2	2	0	0	0	8.49	11.72
No69	71	2	27.112	0	3	7	0	0	0	8.64	10.89
No70	77	2	24.613	0	4	9	0	0	0	8.99	12.02
No71	88	2	23.82	0	3	10	0	0	0	9.67	12.01
non diabetics
No01	55	1	28.2868	0	0	0	0	0	0	4.08317	5.64771
No02	49	1	28.8445	0	0	0	0	0	0	6.01669	7.43258
No03	43	1	21.9102	2	0	0	0	0	0	5.00026	6.9804
No04	58	2	22.2817	0	0	0	0	0	0	4.04387	5.01799
No05	45	2	22.1167	0	0	0	1	0	0	4.31	5.61198
No06	69	1	26.7698	0	0	0	0	0	0	4.0486	6.03688
No07	76	2	22.9468	0	0	0	0	0	0	3.5391	5.02516
No08	52	1	26.1705	0	0	0	0	0	0	3.69091	7.24662
No09	40	2	28.4212	0	0	0	0	0	0	6.30224	7.00933
No10	51	2	27.6704	2	0	0	0	0	0	5.81844	7.60963
No11	67	1	25.7028	0	0	0	0	0	0	5.79475	5.92691
No12	56	1	28.557	0	0	0	0	0	0	4.29716	6.3489
No13	52	2	22.163	0	0	0	0	0	0	4.67771	7.34483
No14	51	1	26.1826	0	0	0	0	0	0	5.40381	6.35685
No15	60	2	24.2179	0	0	0	0	0	0	4.10164	7.24847
No16	56	2	21.5977	0	0	0	0	0	0	4.8447	7.21955
No17	71	1	24.3911	0	0	0	0	0	0	5.51473	6.63211
No18	33	2	28.8291	2	0	0	0	0	0	4.88511	6.74231
No19	42	1	28.1771	0	0	0	0	0	0	4.52911	7.1741
No20	54	1	30.4043	0	0	0	0	0	0	4.06512	7.23173
No21	28	2	24.0578	0	0	0	0	0	0	5.74376	7.59994
No22	53	1	23.4534	0	0	0	0	0	0	5.29421	6.71287
No23	46	2	30.8861	0	0	0	0	0	0	4.48753	7.19044
No24	51	1	25.3828	0	0	0	0	0	0	5.29972	7.34108
No25	56	2	25.368	0	0	0	0	0	0	5.2324	6.77346
No26	42	1	30.981	0	0	0	0	1	0	5.33	8.39131
No27	56	1	29.6636	0	0	0	0	0	0	6.08169	7.77181
No28	54	2	28.6101	0	0	0	0	0	0	5.1135	6.91194
No29	61	1	29.9001	0	0	0	0	0	0	4.43754	6.27154
No30	35	2	23.0622	0	0	0	0	0	0	5.17563	7.31446
No31	59	1	28.1302	0	0	0	0	0	0	4.55438	7.88774
No32	51	1	28.0411	0	0	0	0	0	0	5.92511	6.26093
No33	70	2	26.0567	0	0	0	0	0	0	5.3502	7.0828
No34	39	1	25.0211	2	0	0	0	0	0	5.65456	7.87219
No35	41	2	28.1508	0	0	0	0	0	0	6.00366	6.23055
No36	48	1	24.8787	0	0	0	0	0	0	4.32031	7.52066
No37	33	2	27.1971	0	0	0	0	0	0	4.09428	6.52891
No38	56	1	26.804	0	0	0	0	0	0	4.77302	6.13478
No39	51	2	27.295	0	0	0	1	0	0	3.57	7.42278
No40	77	1	24.3425	0	0	0	0	0	0	5.60132	6.4477
No41	79	2	19.2084	0	0	0	0	0	0	4.98913	5.12385
No42	42	1	28.428	2	0	0	0	0	0	3.90555	5.45375
No43	51	1	29.7781	0	0	0	0	0	0	4.3002	6.80801
No44	57	2	24.3367	0	0	0	0	0	0	3.65854	6.48783
No45	23	2	23.2013	0	0	0	0	0	0	4.93485	7.21617
No46	54	2	23.9408	2	0	0	0	0	0	5.16965	5.84766
No47	66	1	26.8107	0	0	0	0	0	0	4.83489	6.90175
No48	47	2	24.2029	0	0	0	0	0	0	5.36514	5.06449
No49	53	1	27.3265	0	0	0	0	0	0	4.52486	5.08521
No50	47	2	30.2416	0	0	0	0	0	0	4.62942	6.766
No51	43	2	26.2674	0	0	0	0	0	0	5.29284	5.67995
No52	77	1	28.5603	0	0	0	0	0	0	3.9537	6.71911
No53	53	2	27.2571	0	0	0	0	0	0	4.76499	6.41769
No54	83	1	30.9263	0	0	0	0	0	0	4.26325	5.76013
No55	54	2	23.7985	0	0	0	0	0	0	4.10325	6.02678
No56	42	2	25.8192	2	0	0	0	0	0	5.08075	6.28394
No57	57	2	29.1046	0	0	0	0	0	0	4.71885	5.64837
No58	53	1	25.8895	0	0	0	0	0	0	4.88704	6.32715
No59	42	1	27.9974	2	0	0	0	0	0	5.21264	7.09884
No60	78	2	21.9753	0	0	0	1	0	0	4.98	5.12736
No61	56	2	22.5129	0	0	0	0	0	0	4.15456	6.97674
No62	53	1	28.832	0	0	0	0	0	0	4.4896	7.32706
No63	61	2	28.5933	0	0	0	0	0	0	5.73866	6.00058
No64	39	2	21.9899	0	0	0	0	0	0	3.99319	7.31383
No65	51	2	25.6622	0	0	0	0	0	0	5.65245	6.84166
No66	72	1	23.127	0	0	0	0	0	0	4.82728	6.01556
No67	48	1	22.9625	0	0	0	0	0	0	4.90981	7.80087
No68	55	2	28.3487	0	0	0	0	0	0	5.00912	6.10758
No69	57	1	26.3511	0	0	0	0	0	0	4.08338	6.02167
No70	52	2	26.8164	0	0	0	0	0	0	4.87585	7.49581
No71	49	1	27.3201	0	0	0	0	0	0	4.66588	6.20179
No72	46	2	25.8732	2	0	0	0	0	0	4.05301	5.84177
No73	57	2	22.7962	0	0	0	0	0	0	5.08124	6.14334
No74	81	1	25.8037	0	0	0	0	0	0	5.1796	5.55176
No75	37	2	27.7678	2	0	0	0	0	0	4.46716	6.6434
No76	49	2	21.6341	0	0	0	0	0	0	4.88355	7.14516
No77	88	1	29.9898	0	0	0	0	0	0	5.17316	7.04812
No78	47	2	27.7292	0	0	0	0	0	0	5.299	6.27304
No79	51	1	29.2871	0	0	0	0	0	0	4.35221	5.63291
No80	41	2	25.8445	0	0	0	0	0	0	3.82222	6.00919
No81	56	2	23.8353	0	0	0	0	0	0	4.99542	6.27326
No82	58	2	28.1082	0	0	0	0	0	0	3.91672	5.94664
No83	42	2	234.5	2	0	0	0	0	0	4.37582	6.33418
No84	43	1	22.0815	2	0	0	1	0	0	6.19	7.86626
No85	55	2	26.9759	0	0	0	0	0	0	4.75613	6.70612
No86	53	2	23.4437	0	0	0	0	0	0	5.74152	6.53153
No87	83	2	25.2174	0	0	0	0	0	0	4.44345	5.33152
No88	48	2	27.3902	0	0	0	0	0	0	5.02986	6.23557
No89	54	2	26.0787	0	0	0	0	0	0	3.97775	6.52249
No90	69	1	30.3444	0	0	0	0	0	0	5.52281	6.2815
No91	52	1	26.4783	0	0	0	0	0	0	4.33836	7.7985
No92	48	2	23.4273	0	0	0	0	0	0	4.87275	6.53977
No93	33	2	28.6419	2	0	0	0	0	0	5.44283	6.27304
No94	67	1	22.6398	0	0	0	0	0	0	4.48874	5.63291
No95	46	2	27.5682	0	0	0	0	0	0	5.04154	6.20919
No96	71	1	28.9053	0	0	0	0	0	0	3.99	6.25326
No97	52	2	21.9893	0	0	0	0	0	0	4.94115	5.64664

## Sheet: list-B
Repondents							Degree of depression				glucose(B4 treatment)		glucose(after2 month)		glucose(after3 month)		glucose(after5 month)		BMI
Treatment group(少一男一女)	age	sex	BMI	Education	Complications()	medical history(years)	B4 treatment	after2 month	after3 month	after5 month	FBG	2hBG	FBG	2hBG	FBG	2hBG	FBG	2hBG	B4 treatment	after2 month	after3 month	after5 month
No01	55		23.82	0	3	10	0.55	0.51	0.42	0.46	8.84	11.21	6.9	9.64	6.29	8.39	7.56	9.75	23.82	23.72	23.54	23.65
No02	68	1	24.58	0	1	6	0.53	0.48	0.42	0.48	8.63	10.55	7.12	8.76	6.57	7.95	7.17	8.97	24.58	24.18	23.25	24.72
No03	76	1	25.37	0	2	10	0.56	0.52	0.45	0.52	8.89	11.29	6.75	9.7366	5.99	9.04	7.52	9.28	25.37	25.01	24.19	25.03
No04	58	2	25.28	0	1	6	0.59	0.54	0.42	0.55	8.95	10.85	6.98	8.54	5.98	7.75	7.66	9.49	26.26	26.21	25.77	26.21
No05	75	1	24.15	0	2	8	0.55	0.51	0.43	0.53	8.86	11.83	7.31	9.5	6.68	8.54	8.1	10.14	28.14	28.07	26.89	27.84
No06	62	2	23.57	0	2	2	0.58	0.57	0.45	0.55	8.78	12.13	7.01	9.73	6.4	8.35	7.44	10.22	23.57	23.48	23.12	23.32
No07	61	1	27.26	0	3	5	0.59	0.53	0.47	0.58	9.31	12.56	7.62	10.6	6.16	9.89	7.96	10.27	27.2	26.98	26.77	26.32
No08	72	2	24.61	0	4	7	0.66	0.61	0.5	0.59	10.82	13.12	9.23	10.84	8.42	9.29	10.12	11.22	24.61	24.5	23.98	23.12
No09	60	1	27.11	0	3	10	0.88	0.82	0.62	0.76	11.03	13.13	9.39	10.84	8.49	10.1	10.3737	10.98	29.06	28.86	28.02	27.78
No10	61	1	24.66	2	1	2	0.46	0.49	0.34	0.42	8.41	11.76	6.82	9.44	6.18	8.39	6.99	9.48	24.66	24.43	24	24.43
No11	43	1	19.96	0	2	3	0.45	0.43	0.35	0.42	7.99	12.24	6.96	9.83	5.87	8.54	6.98	10.86	24.96	24.57	24.13	24.23
No12	53	1	26.49	0	2	2	0.47	0.42	0.36	0.42	8.34	12.89	6.32	11.4	5.52069	9.88	7.17	11.3	26.4	26.25	26.17	26.11
No13	71	1	27.53	0	3	4	0.49	0.41	0.37	0.41	8.63	12.42	6.7	10.83	6.14	9.39	7.72	10.52	27.31	27.54	27.24	27.24
No15	52	1	24.9	0	1	2	0.47	0.43	0.39	0.44	8.31	10.76	6.19	8.43	4.8	7.34	7.2	9.22	24.9	24.25	24.53	24.35
No16	64	1	25.38	0	2	4	0.46	0.41	0.36	0.41	8.82	10.95	6.65	9.4	5.38	8	7.5	9.01	25.38	25.25	24.79	25.35
No17	59	2	24.35	0	2	5	0.45	0.41	0.33	0.45	8.57	12.25	6.9	10.19	6.16	8.99	7.81	10.29	24.35	24.12	24.24	24.76
No18	52	2	28.74	0	1	3	0.54	0.5	0.41	0.54	8.94	10.13	7.66	7.78	6.3	7.16	7.63	8.13	27.56	27.35	26.87	26.54
No19	57	2	28.81	0	3	5	0.57	0.49	0.34	0.49	9.69	12.69	7.93	10.69	6.92	9.35	9.07	10.57	25.79	25.46	25.34	25.86
No20	62	2	29.15	2	2	11	0.56	0.52	0.4	0.55	9.98	12.29	7.86	10.18	6.71	8.64	8.89	10.7	27.11	27.03	26.54	26.79
No21	69	2	27.53	0	1	4	0.57	0.53	0.39	0.53	9.09	11.3	7.62	8.89	6.85	7.55	7.62	9.55	26.53	26.67	25.43	26.02
No22	57	2	25.78	0	3	7	0.59	0.52	0.43	0.55	9.28	12.61	7.54	11.06	6.16	9.55	7.89	10.77	24.78	24.43	24.04	24.79
No23	67	2	28.56	0	3	8	0.58	0.53	0.41	0.5	9.18	12.46	7.47	10.3	6.99	9.27	8.05	10.89	27.51	27.49	26.25	27.76
No24	54	2	23.85	0	2	9	0.55	0.51	0.41	0.49	8.53	13.4	6.48606	11.27	5.98	10.52	7.48	12.02	23.84	23.89	23.11	23.11
No25	65	2	25.33	0	3	11	0.59	0.53	0.45	0.52	9.97	13.99	8.28658	12.51	7.3	11.27	8.85	12.43	25.33	25.27	24.76	24.76
No26	60	2	26.55	0	2	2	0.57	0.54	0.41	0.43	8.98	13.59	6.97272	11.7	5.69298	10.42	7.46	11.79	26.49	26.57	26.23	26.23
No28	58	2	24.3	0	4	7	0.65	0.59	0.5	0.57	9.98	13.75	8.44417	12.22	7.48	11.43	9.3	11.53	28.29	28.35	27.89	28.11
No29	35	2	28.28	0	4	6	0.89	0.8	0.57	0.72	10.83	14.54	9.18813	13.03	8.33	11.51	9.47	13.13	26.11	26.73	26.29	25.92
No30	44	2	27.15	2	2	4	0.69	0.64	0.51	0.61	10.84	14.16	9.07	12.06	7.92	10.97	10.08	12.52	26.98	26.98	26.13	26.7
No31	62	1	26.4	0	2	5	0.46	0.42	0.34	0.42	8.37	11.74	6.71	9.67	5.42426	8.9	7.59	9.46	26.25	26.76	26.45	26.78
No32	72	1	24.27	0	1	2	0.47	0.41	0.33	0.4	8.98	10.36	7.28	8.55	6.27	6.98	7.68	8.01	24.26	24.09	23.79	23.89
No33	63	2	28.57	0	3	4	0.48	0.43	0.32	0.4	9.54	11.31	7.88	9.34	6.88	7.9	8.85	9.19	26.57	26.64	26.25	26.93
No34	56	1	23.77	2	2	2	0.48	0.42	0.34	0.43	8.87	11.82	7.534	9.8	6.3	8.64	7.65	10.4	25.76	25.36	25.13	25.43
No35	69	2	23.22	0	1	5	0.46	0.43	0.36	0.42	8.72	10.08	7.10832	8.34	6.41	7.22	7.17	8.04	23.22	23.29	22.01	23.23
Control group				0
No36	61	1	23.51	0	3	6	0.58	0.56	0.53	0.54	9.56	11.41	8.22167	10.1	8.19	10.65	8.25	10.46	23.51	23.31	23.29	23.65
No37	59	1	25.21	0	2	5	0.57	0.54	0.55	0.53	8.89	11.6	7.5764	10.87	8.17	10.67	7.8	10.91	24.21	24.32	24.21	24.79
No38	72	2	28.52	0	3	6	0.59	0.56	0.52	0.53	9.62	11.16	8.12097	10.18	9.07	10.79	8.89	9.72	28.27	28.48	28.27	28.28
No39	57	1	24.3	0	4	8	0.57	0.57	0.54	0.57	9.29	12.22	8.22109	11.13	8.13	11.14	8.13	11.67	24.29	24.42	24.29	24.23
No40	74	2	27.9	0	1	6	0.56	0.56	0.54	0.5	9.62	11.46	8.36124	10.89	8.78	10.86	8.35	10.84	27.68	27.29	26.89	26.78
No41	48	1	23.3	2	3	4	0.58	0.54	0.52	0.49	9.17	12.52	7.6244	11.58	8.17	12.1	8.26	11.6393	28.3	28.76	28.26	28.45
No42	58	1	29.79	0	3	7	0.66	0.64	0.66	0.63	10.48	13.32	9.17417	12.17	9.63	12.76	9.38	12.4	24.63	24.23	24.12	24.01
No43	60	2	24.86	0	4	9	0.64	0.61	0.64	0.61	11.85	13.26	11.0876	11.94	10.88	12.36	10.39	12.03	26.78	26.23	25.97	25.73
No44	56	1	23.41	0	2	8	0.46	0.37	0.44	0.43	8.63	10.76	7.1335	10.21	7.75	10.05	7.52	9.72	23.41	23.12	23.01	23.21
No45	54	1	27.65	2	2	2	0.45	0.44	0.43	0.42	8.59	11.12	7.3955	10.36	7.41	10.17	7.76	10.13	25.53	25.23	25.11	24.89
No46	61	1	28.79	0	2	4	0.49	0.47	0.42	0.47	8.65	11.38	7.46371	9.99	7.91	10.26	7.21	10.43	24.74	24.24	24.09	23.83
No47	56	1	22.07	0	2	5	0.46	0.47	0.48	0.45	8.56	12.17	7.54793	11.69	7.72	11.32	7.6	11.57	25.86	25.13	24.67	24.67
No48	46	1	25.93	0	1	2	0.48	0.44	0.45	0.44	8.76	11.05	7.1172	10.52	7.96	9.82	8.06	10.33	28.93	28.43	28.25	27.92
No49	57	1	25.96	0	2	3	0.47	0.43	0.4	0.45	9.1	11.1	7.91847	10.43	7.66	9.87	8.19	10.34	25.93	25.24	25.22	24.96
No50	57	1	23.37	0	1	5	0.48	0.44	0.45	0.44	8.54	10.7	7.68059	10.23	8	10.33	7.52	10.18	23.37	23.23	23.32	23.12
No52	45	2	25.73	0	1	5	0.56	0.57	0.56	0.53	8.98	11.97	7.60307	11.34	8.23	11.4	8	11.21	24.73	24.32	23.89	24.24
No53	68	2	26.98	0	4	9	0.56	0.54	0.52	0.54	9.69	13.09	8.70416	11.84	8.41	12.18	8.61	11.84	26.54	26.81	26.24	26.22
No54	56	2	27.68	0	2	4	0.57	0.59	0.57	0.54	8.74	12.12	7.49142	10.87	7.89	11.79	7.36	10.71	27.65	27.18	26.91	27.19
No55	69	2	28.84	0	4	11	0.57	0.54	0.54	0.51	9.91	13.45	8.94297	12.37	8.9	12.34	8.6	12.89	28.81	28.82	28.23	28.14
No57	53	2	28.87	2	1	5	0.62	0.61	0.59	0.58	9.25	11.5	8.15994	10.16	7.82	10.92	7.87	11	26.84	26.23	25.99	26.31
No58	52	2	26.63	0	4	7	0.63	0.62	0.64	0.62	10.82	13.62	9.77274	12.21	10.1	13.19	9.79	12.29	27.26	27.25	27.11	26.58
No59	66	2	25.16	0	3	9	0.67	0.66	0.63	0.65	9.22	12.84	7.82029	11.55	8.2	11.74	8.44	11.42	25.15	25.38	24.98	25.02
No60	62	2	25.93	0	0	8	0.63	0.59	0.61	0.59	9.23	11.78	8.35443	11.03	8.6	10.57	8.68	10.45	25.9	25.27	25.01	24.97
No61	62	2	24.38	0	5	12	0.86	0.88	0.86	0.83	10.97	13.89	9.7926	13.22	10.29	13.42	10.21	13.43	24.36	24.64	23.9	24.12
No63	58	2	26.68	0	1	2	0.46	0.45	0.45	0.45	8.69	10.99	7.15204	9.7	7.9	9.93	8.02	10.11	25.67	25.87	25.22	24.89
No64	53	2	25.06	0	1	4	0.49	0.46	0.46	0.43	8.74	10.42	7.50275	9.51	8.14	10.05	7.64	9.22	25.05	24.89	24.12	24.89
No65	52	1	25.16	2	1	2	0.46	0.45	0.46	0.45	8.68	10.39	7.56575	9.85	7.31	9.8	7.67	9.07	25.15	25.23	24.78	25.13
No66	41	2	24.22	0	1	2	0.48	0.47	0.46	0.44	8.36	10.38	7.02242	9.85	6.87	9.97	7.55	8.96	24.21	24.32	24.02	23.89
No68	79	1	23.63	0	0	6	0.47	0.45	0.46	0.44	8.54	10.8	7.30643	9.96	7.96	9.79	7.59	10.07	23.89	23.36	23.21	22.91
No69	75	2	28.12	0	3	7	0.46	0.47	0.46	0.45	8.95	12.03	8.21561	10.79	8.13	11.33	8.3	10.98	27.872	27.49	27.26	27.21
No70	82	1	24.52	0	1	5	0.49	0.47	0.45	0.44	8.64	11.45	7.34	10.06	7.66	10.24	7.43	10.45	24.52	24.43	24.43	24.98
No71	51	2	27.31	0	2	2	0.47	0.45	0.44	0.44	8.49	11.72	7.49	10.32	7.27	11.02	7.43	10.84	26.28	26.21	26.09	26.44

## Sheet: Sample Legend
	Profile of the Respondents
	Sex
	Male	1
	Female	2
	Education
	Highschool below	1
	Highschool or above	2
	Self—Rating Depression Scale，SDS
			A little of the time	Some of the time	Good part of the time	Most of the time
1	I feel down-hearted and blue.		1	2	3	4
*2	Morning is when I feel the best.		4	3	2	1
3	I have crying spells or feel like it.		1	2	3	4
4	I have trouble sleeping at night.		1	2	3	4
*5	I eat as much as I used to.		4	3	2	1
*6	I still enjoy sex.		4	3	2	1
7	I notice that I am losing weight.		1	2	3	4
8	I have trouble with constipation.		1	2	3	4
9	My heart beats faster than usual.		1	2	3	4
10	I get tired for no reason.		1	2	3	4
*11	My mind is as clear as it used to be.		4	3	2	1
*12	I find it easy to do the things I used to.		4	3	2	1
13	I am restless and can’t keep still.		1	2	3	4
*14	I feel hopeful about the future.		4	3	2	1
15	I am more irritable than usual.		1	2	3	4
*16	I find it easy to make decisions.		4	3	2	1
*17	I feel that I am useful and needed.		4	3	2	1
*18	My life is pretty full.		4	3	2	1
19	I feel that others would be better off if I were dead.		1	2	3	4
*20	I still enjoy the things I used to do.		4	3	2	1

## Sheet: Sample Questionaire
CODE		Profile of the Respondents
	1	Age
	2	Sex
	3	BMI
	4	Education
	5	Complications
	6	medical history(months)
	7	FBM(mmol/L)
	8	2hBM(mmol/L)
Self—Rating Depression Scale，SDS
SDS1	1	I feel down-hearted and blue.
SDS2	*2	Morning is when I feel the best.
SDS3	3	I have crying spells or feel like it.
SDS4	4	I have trouble sleeping at night.
SDS5	*5	I eat as much as I used to.
SDS6	*6	I still enjoy sex.
SDS7	7	I notice that I am losing weight.
SDS8	8	I have trouble with constipation.
SDS9	9	My heart beats faster than usual.
SDS10	10	I get tired for no reason.
SDS11	*11	My mind is as clear as it used to be.
SDS12	*12	I find it easy to do the things I used to.
SDS13	13	I am restless and can’t keep still.
SDS14	*14	I feel hopeful about the future.
SDS15	15	I am more irritable than usual.
SDS16	*16	I find it easy to make decisions.
SDS17	*17	I feel that I am useful and needed.
SDS18	*18	My life is pretty full.
SDS19	19	I feel that others would be better off if I were dead.
SDS20	*20	I still enjoy the things I used to do.

## Sheet: Objectives
The aim of this study is to investigate the depression status of diabetic patients and develop psychological intervention measures for diabetic patients with depression. Specifically, the study analyzed information about the respondents' age, sex, BMI, education level, years of illness, complications and blood sugar levels. The depression level of diabetic patients was evaluated by SDS scale, and…
